# Supplementary material
Source: publisher figshare collection journal article supplement (https://acs.figshare.com/ndownloader/files/21742713)
Supplement: Supplementary file 1 [file 21742713]

## **Sulfur-Modified Carbon-Coated CoMoO<sub>3</sub> Nanohybrid Electrodes for Enhanced Lithium-Storage Capacity**

Bo Zhang, Yingqi. Li, Yue Ma, Bo Jin, Xingyou Lang, Yongfu Zhu,\* Qing Jiang

Key Laboratory of Automobile Materials, Ministry of Education (Jilin University),  
School of Materials Science and Engineering, Jilin University, Changchun 130022,  
China

\*Corresponding author

E-mail: yfzhu@jlu.edu.cn

### *Electrodes preparation and electrochemical measurements*

The preparation process of our electrodes is provided as follows: the active materials, poly vinylidene fluoride (PVDF) and acetylene black were grinded with a mass ratio of 70:10:20. The addition of suitable N-methyl-2-pyrrolidone (NMP) solvent makes the mixture form uniform slurry. Then the slurry was directly pasted on the copper foil, and we then dry it at 110 °C. The average mass loading of these electrodes was ~0.93 mg cm<sup>-2</sup>. Various electrodes were encapsulated into a typical 2016 coin-type cell. The Li foil was utilized as the counter and reference electrodes, and 1 M LiPF<sub>4</sub> solution (equivalent ethylene carbonate (EC), ethyl methyl carbonate (EMC) and dimethyl carbonate (DMC) were utilized to form mixed solvent) as electrolyte. The cyclic voltammetry (CV), galvanostatic charge-discharge (GCD) and electrochemical impedance spectroscopy (EIS) measurements were operated via CHI 660e electrochemical working station and CT2001A LAND test system.

For the  $\text{CoMoO}_3/\text{C-S}/\text{Li}$  LIB device, the calculation equations of energy density (E) and power density (P) are presented as follow:

$$E = \frac{\int QdV}{m} = \frac{\int itdV}{m} \quad (\text{S1})$$

$$P = \frac{E}{\Delta t} \quad (\text{S2})$$

wherein the  $Q$ ,  $V$ ,  $i$ ,  $t$ ,  $\Delta t$  represents the capacity, potential, discharge current, time and entire discharge time.

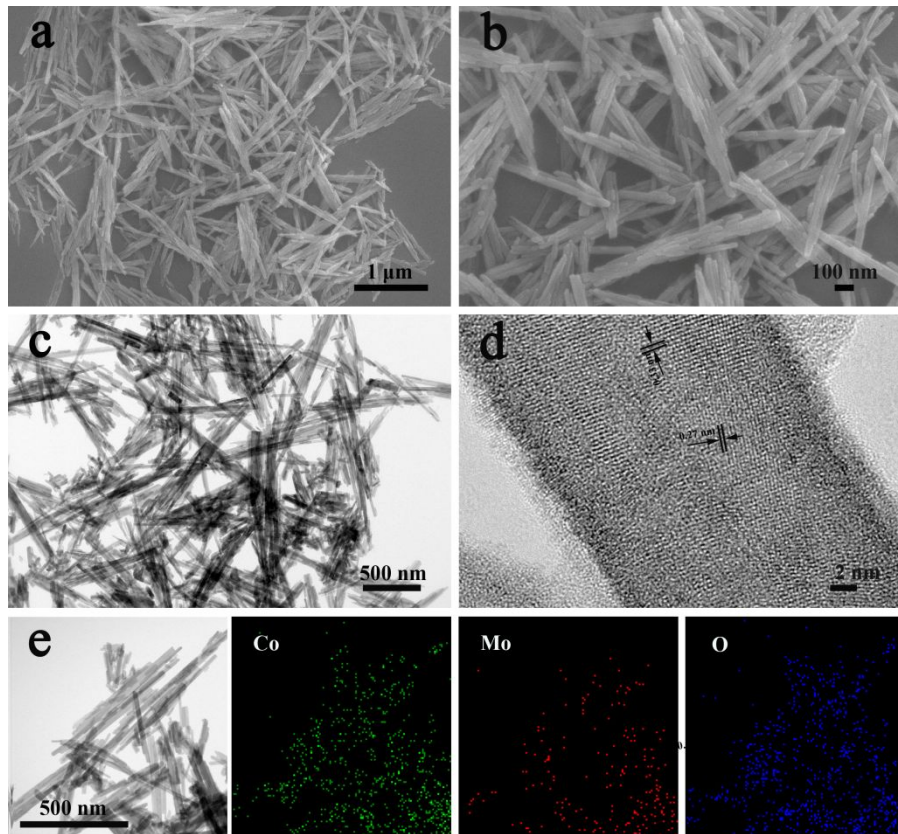

**Fig. S1** (a and b) FESEM observation of  $\text{CoMoO}_4$  sample; (c) TEM observation of  $\text{CoMoO}_4$  sample; (d) HRTEM observation of  $\text{CoMoO}_4$  sample; (e) element scanning of  $\text{CoMoO}_4$  sample

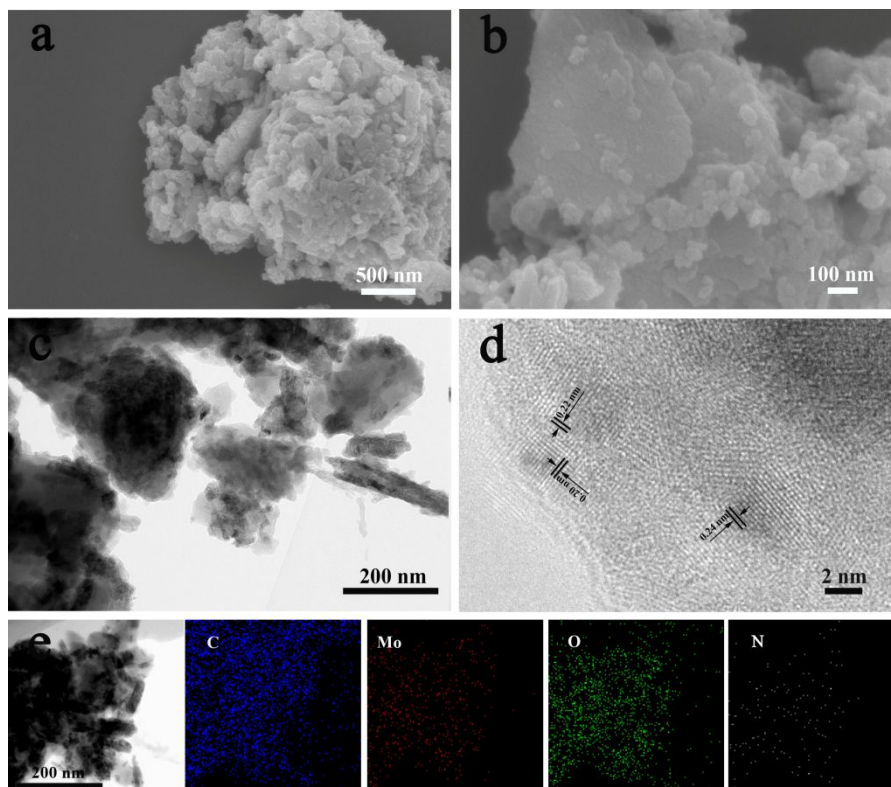

**Fig. S2** (a and b) FESEM observation of  $\text{CoMoO}_3/\text{C}$  sample; (c) TEM observation of  $\text{CoMoO}_3/\text{C}$  sample; (d) HRTEM observation of  $\text{CoMoO}_3/\text{C}$  sample; (e) element scanning of  $\text{CoMoO}_3/\text{C}$ .

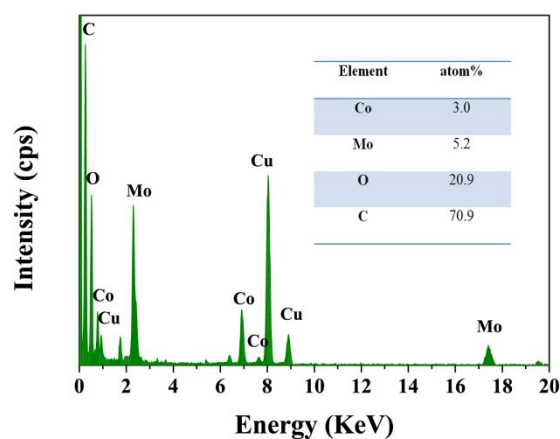

**Fig. S3** EDS data of CoMoO<sub>3</sub>/C

On the basis of the mapping of CoMoO<sub>3</sub>/C (Fig. S2e), the N signal is pretty weaker, suggesting a pretty lower N content in C structure. Also, the EDS data in Fig. S3 could not show obvious N content, revealing that the N content is negligible. Therefore, we didn't highlight the N doped C. Instead, we state the C coating in our work.

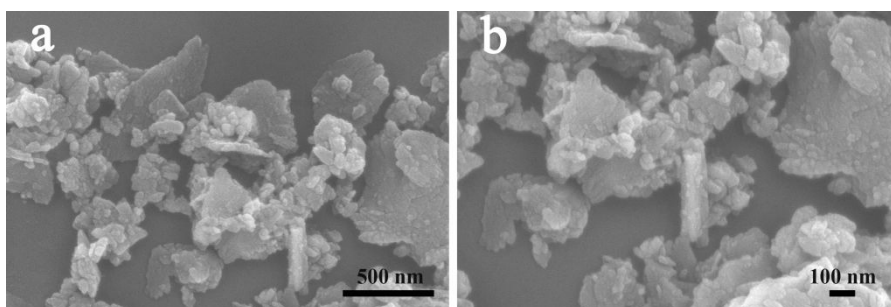

**Fig. S4** (a and b) FESEM observation of CoMoO<sub>4</sub>-PDA sample

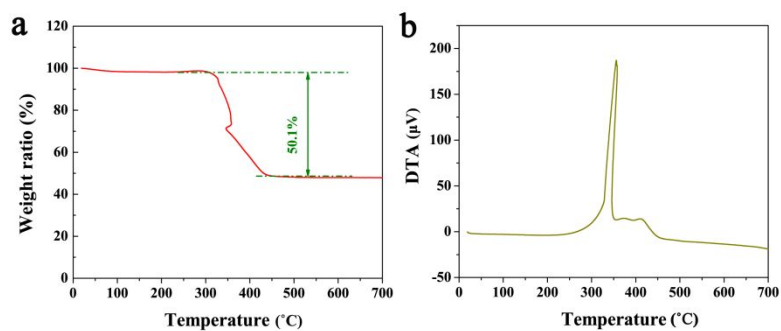

**Fig. S5** (a) TG curve of CoMoO<sub>3</sub>/C; (b) DTA curve of CoMoO<sub>3</sub>/C

To investigate the weight ratios of C and MoS<sub>2</sub> in CoMoO<sub>3</sub>/C-S, we have made TGA and ICP test. In Fig. S5, the TGA result of CoMoO<sub>3</sub>/C was shown. The declined weight of the sample during the heating process is 50.1%. Assuming that the CoMoO<sub>3</sub> was oxidized to CoMoO<sub>4</sub> in the TG test, and the mass ratio of C is calculated as 46.25% of CoMoO<sub>3</sub>/C. Because there are many factors (MoS<sub>2</sub>, C, CoMoO<sub>3</sub>) in the CoMoO<sub>3</sub>/C-S, the calculation of C content seem difficult via the TG result of CoMoO<sub>3</sub>/C-S. In view of high C content and partial S modification, we approximately utilized the 46.25% (C content of CoMoO<sub>3</sub>/C) as the C content of CoMoO<sub>3</sub>/C-S.

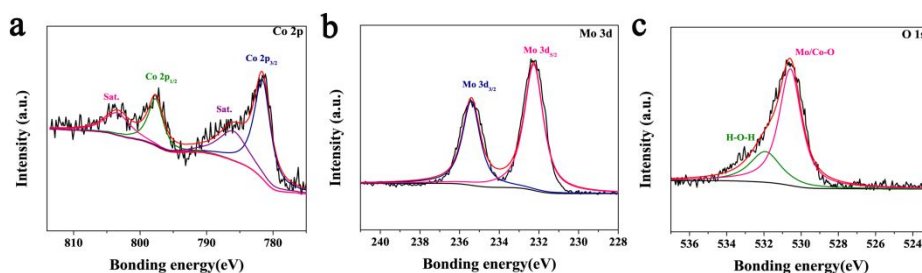

**Fig. S6** (a-c) XPS spectra of CoMoO<sub>4</sub> for different elements: (a) Co 2p; (b) Mo 3d; and (c) O 1s

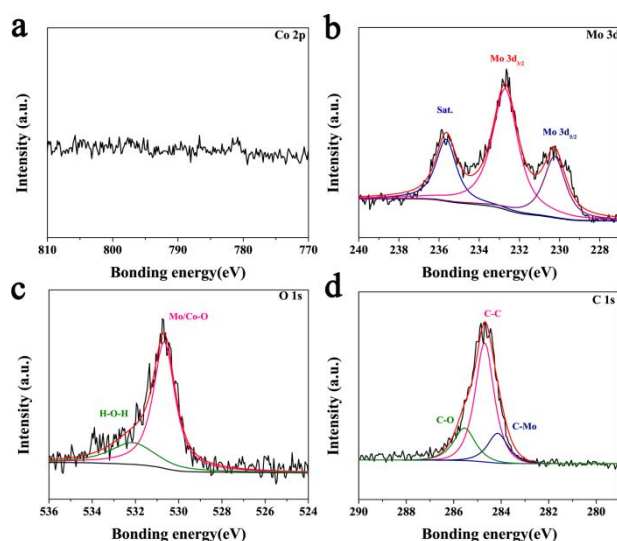

**Fig. S7** (a-d) XPS spectra of CoMoO<sub>3</sub>/C for different elements: (a) Co 2p; (b) Mo 3d; and (c) O 1s; (d) C 1s.

**Table S1** ICP data of CoMoO<sub>3</sub>/C-S sample

|                                                | Co                  | Mo                  | S                   |
|------------------------------------------------|---------------------|---------------------|---------------------|
| mass concentration<br>(mg L <sup>-1</sup> )    | 0.2466              | 0.4398              | 0.3627              |
| molar concentration<br>(mmol L <sup>-1</sup> ) | 4.17E <sup>-3</sup> | 4.58E <sup>-3</sup> | 1.13E <sup>-3</sup> |

Also, the ICP results CoMoO<sub>3</sub>/C-S was shown in Table S1, the mole ratio of Co:Mo:S is 4.22: 4.63: 1.15. Because the outer nanosheet is low-crystallinity MoS<sub>2</sub>, we approximately assess the content of MoS<sub>2</sub> (Co doped MoS<sub>2</sub> is considered as

MoS<sub>2</sub>) via the ICP result of S element. By an approximate treatment, we use the Co element to assess the content of CoMoO<sub>3</sub>. Thus, the mole ratio of CoMoO<sub>3</sub> and MoS<sub>2</sub> is 4.22:0.575. Based on the 46.25% C content and MoS<sub>2</sub>:CoMoO<sub>3</sub>, the ratio of CoMoO<sub>3</sub>:C:MoS<sub>2</sub> is about 47.30: 46.25: 6.45.

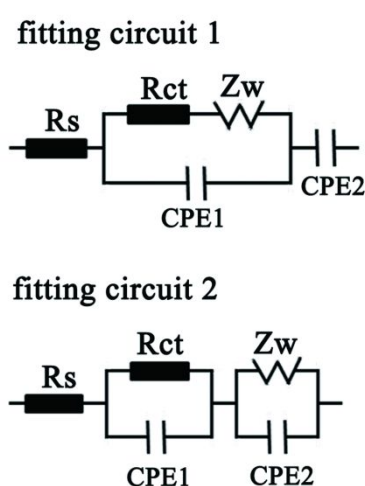

**Fig. S8** Fitting circuit 1 for CoMoO<sub>4</sub> and CoMoO<sub>3</sub>/C and fitting circuit 2 for CoMoO<sub>3</sub>/C-S

**Table. S2**  $R_s$  and  $R_{ct}$  values of CoMoO<sub>4</sub>, CoMoO<sub>3</sub>/C and CoMoO<sub>3</sub>/C-S;

|                         | $R_s$ ( $\Omega$ ) | $R_{ct}$ ( $\Omega$ ) |
|-------------------------|--------------------|-----------------------|
| CoMoO <sub>4</sub>      | 9.51               | 179.10                |
| CoMoO <sub>3</sub> /C   | 16.87              | 51.77                 |
| CoMoO <sub>3</sub> /C-S | 14.01              | 70.95                 |



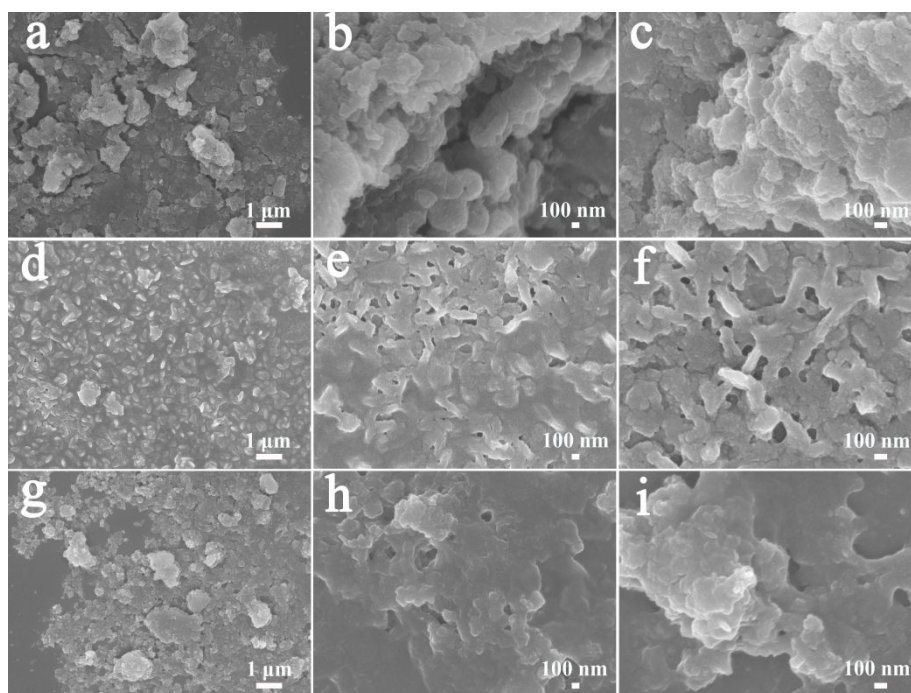

**Fig. S9** (a-c) FESEM observation of  $\text{CoMoO}_3/\text{C-S}$  sample after 500 cycles; (d-f) FESEM observation of  $\text{CoMoO}_4$  sample after 500 cycles; (g-i) FESEM observation of  $\text{CoMoO}_3/\text{C}$  sample after 500 cycles.

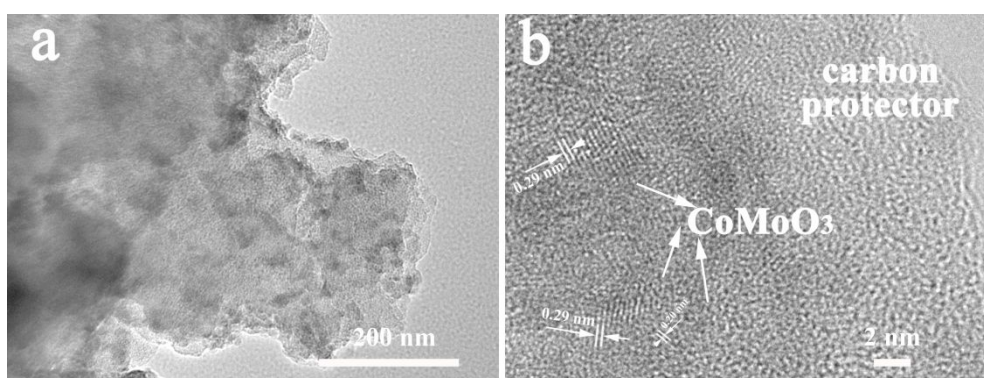

**Fig. S10** (a) TEM observation of  $\text{CoMoO}_3/\text{C-S}$  sample after 500 cycles; (b) HRTEM observation of  $\text{CoMoO}_3/\text{C-S}$  sample after 500 cycles



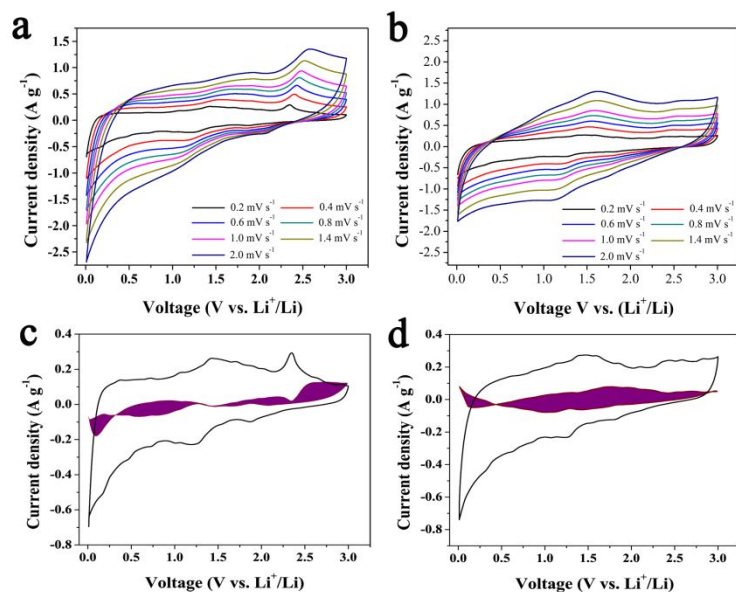

**Fig. S11** (a and b) CV curves of CoMoO<sub>3</sub>/C-S at different scanning rates before cycles and after 500 cycles; (c and d) Extraction of the capacitive contribution in the entire CV at 2 mV s<sup>-1</sup> for CoMoO<sub>3</sub>/C-S electrode before cycles and after 500 cycles.

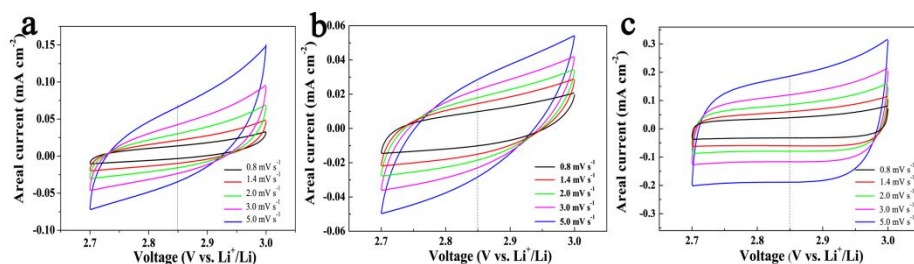

**Fig. S12** (a) CV curves in the potential region 2.7-3.0V of CoMoO<sub>3</sub>/C-S before cycles; (b) CV curves in the potential region 2.7-3.0V of CoMoO<sub>3</sub>/C-S after 100 cycles; (c) CV curves in the potential region 2.7-3.0V of CoMoO<sub>3</sub>/C-S after 500 cycles.

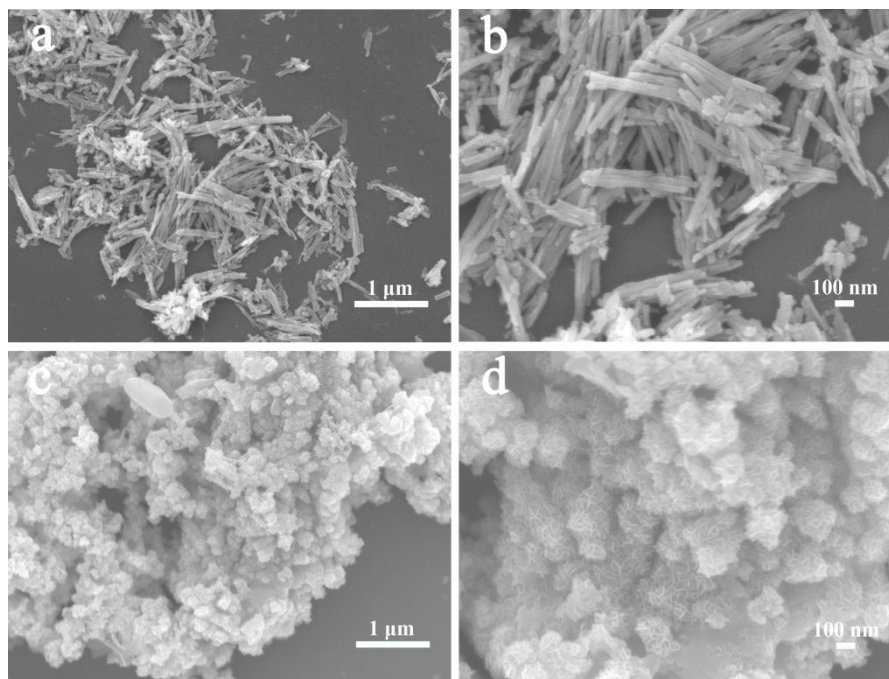

**Fig. S13** (a and b) FESEM observation of CoMoO<sub>4</sub>-H sample; (c and d) FESEM observation of CoMoO<sub>4</sub>-S sample

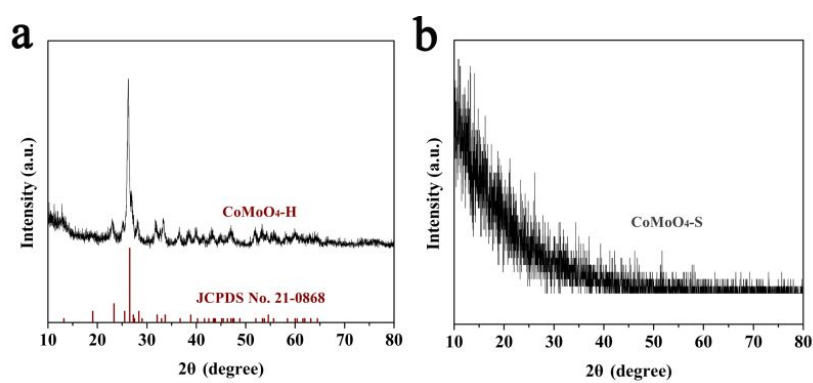

**Fig. S14** (a and b) XRD curves of CoMoO<sub>4</sub>-H and CoMoO<sub>4</sub>-S samples

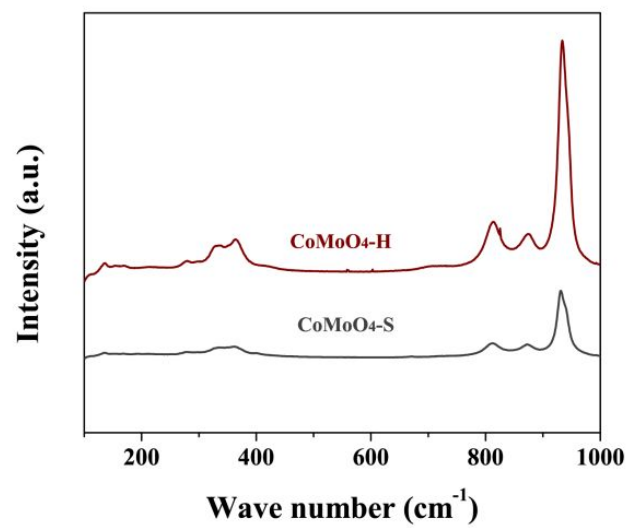

**Fig. S15** Raman spectra of CoMoO<sub>4</sub>-H and CoMoO<sub>4</sub>-S samples

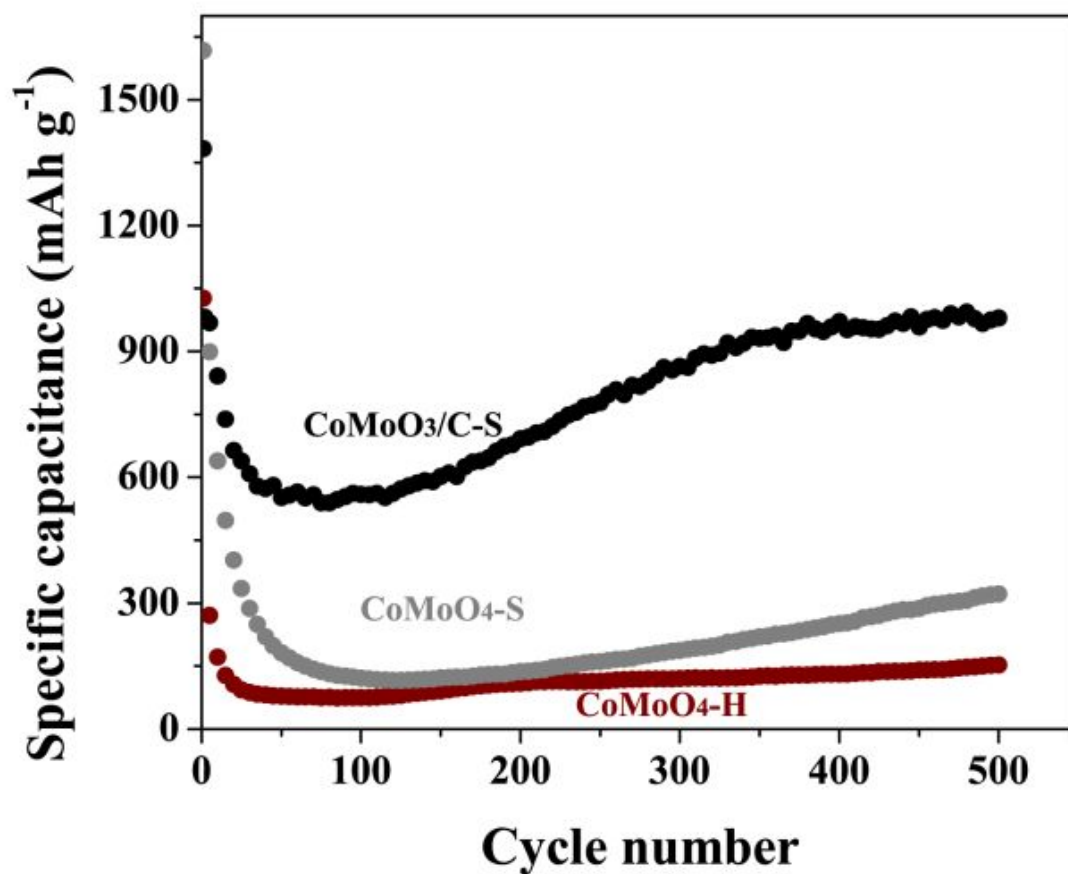

Fig. S16 Cycling performance of CoMoO<sub>3</sub>/C-S, CoMoO<sub>4</sub>-H and CoMoO<sub>4</sub>-H-S

electrodes.

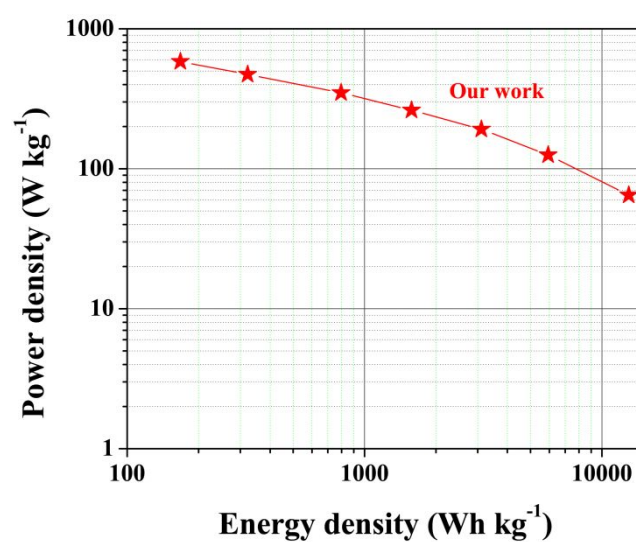

Fig. S17 Ragone plot for CoMoO<sub>3</sub>/C-S//Li plate
